# Supplementary figures and images for: Cryptococcosis Serotypes Impact Outcome and Provide Evidence of Cryptococcus neoformans Speciation
Source: PubMed Central journal article supplement — mBio. 2015 Jun 9;6(3):e00311-15. doi: 10.1128/mBio.00311-15 (PMC4462623; doi:10.1128/mbio.00311-15), 2015-06-09

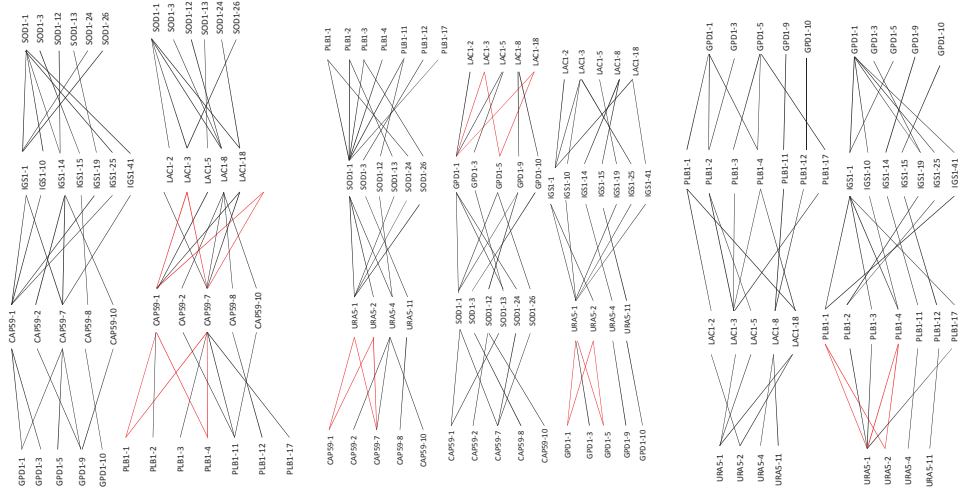

S1.A

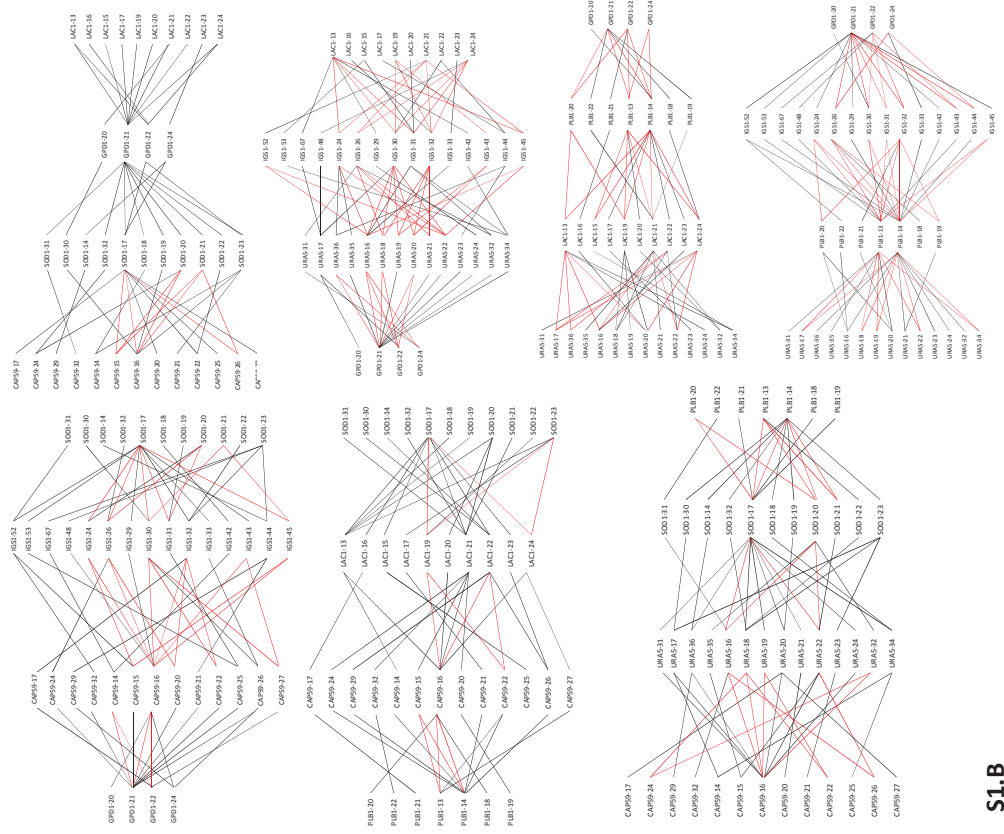

S1.B

Supplement: mbo003152362sf1.pdf [file mbo003152362sf1.pdf]
